# Supplementary material
Source: PubMed Central journal article supplement (PMC7061293)
Supplement: Supp_Table1.pdf [file Supp_Table1.pdf]

SUPPLEMENTARY TABLE S1. PARTICIPANT CHARACTERISTICS: 2016–2018

|                                                    | Overall,<br>N=22,697 | 1–5 years old,<br>N=415 | 6–12 years old,<br>N=3688 | 13–17 years old,<br>N=6675 | 18–25 years old,<br>N=4535 | 26–49 years old,<br>N=3939 | ≥50 years old,<br>N=3445 |
|----------------------------------------------------|----------------------|-------------------------|---------------------------|----------------------------|----------------------------|----------------------------|--------------------------|
| Demographic and clinical characteristics           |                      |                         |                           |                            |                            |                            |                          |
| Sex, <sup>a</sup> female, <i>n</i> (%)             | 11,394 (50)          | 185 (45)                | 1772 (48)                 | 3249 (49)                  | 2235 (49)                  | 2143 (55)                  | 1810 (53)                |
| Race/ethnicity, <sup>a</sup> <i>n</i> (%)          |                      |                         |                           |                            |                            |                            |                          |
| White non-Hispanic                                 | 18,368 (82)          | 317 (78)                | 2775 (76)                 | 5142 (77)                  | 3606 (80)                  | 3353 (86)                  | 3175 (93)                |
| Black non-Hispanic                                 | 1288 (6)             | 22 (5)                  | 251 (7)                   | 436 (7)                    | 224 (5)                    | 217 (6)                    | 138 (4)                  |
| Hispanic or Latino                                 | 1866 (8)             | 42 (10)                 | 382 (11)                  | 703 (11)                   | 495 (11)                   | 193 (5)                    | 51 (1)                   |
| Other                                              | 1008 (4)             | 26 (6)                  | 228 (6)                   | 365 (5)                    | 199 (4)                    | 134 (3)                    | 56 (2)                   |
| Annual household income, <sup>a</sup> <i>n</i> (%) |                      |                         |                           |                            |                            |                            |                          |
| <\$50,000                                          | 5086 (31)            | 110 (36)                | 949 (34)                  | 1564 (31)                  | 879 (29)                   | 953 (31)                   | 631 (25)                 |
| \$50,000 to <\$75,000                              | 2817 (17)            | 59 (19)                 | 471 (17)                  | 829 (17)                   | 441 (15)                   | 552 (18)                   | 465 (19)                 |
| ≥\$75,000                                          | 8725 (52)            | 134 (44)                | 1357 (49)                 | 2580 (52)                  | 1703 (56)                  | 1535 (50)                  | 1416 (56)                |
| Education level, <sup>a</sup> <i>n</i> (%)         |                      |                         |                           |                            |                            |                            |                          |
| Less than Bachelor degree                          | 10,558 (49)          | 221 (55)                | 1760 (50)                 | 3192 (50)                  | 2427 (57)                  | 1554 (43)                  | 1404 (45)                |
| Bachelor degree                                    | 6049 (28)            | 97 (24)                 | 940 (27)                  | 1735 (27)                  | 980 (23)                   | 1374 (38)                  | 923 (30)                 |
| Master, professional or doctorate                  | 4724 (22)            | 86 (21)                 | 811 (23)                  | 1435 (23)                  | 881 (21)                   | 715 (20)                   | 796 (25)                 |
| Insurance status, <sup>a</sup> <i>n</i> (%)        |                      |                         |                           |                            |                            |                            |                          |
| Private                                            | 16,028 (74)          | 242 (63)                | 2324 (68)                 | 4503 (72)                  | 3498 (80)                  | 3229 (85)                  | 2232 (66)                |
| Other                                              | 5339 (25)            | 139 (36)                | 1032 (30)                 | 1716 (27)                  | 812 (19)                   | 517 (14)                   | 1123 (33)                |
| None                                               | 243 (1)              | 5 (1)                   | 49 (1)                    | 68 (1)                     | 48 (1)                     | 50 (1)                     | 23 (<1)                  |
| Duration of diabetes, median (IQR)                 | 10 (6–19)            | 2 (2–3)                 | 6 (3–7)                   | 8 (6–11)                   | 11 (8–15)                  | 22 (15–29)                 | 35 (23–46)               |
| Duration group, years, <i>n</i> (%)                |                      |                         |                           |                            |                            |                            |                          |
| 1 to <5                                            | 3392 (15)            | 370 (>99)               | 1509 (42)                 | 1113 (17)                  | 261 (6)                    | 99 (3)                     | 40 (1)                   |
| 5 to <10                                           | 7300 (32)            | 2 (<1)                  | 1949 (54)                 | 3313 (50)                  | 1527 (34)                  | 378 (10)                   | 131 (4)                  |
| 10 to <20                                          | 6617 (29)            | —                       | 159 (4)                   | 2190 (33)                  | 2551 (56)                  | 1211 (31)                  | 506 (15)                 |
| 20 to <30                                          | 2207 (10)            | —                       | —                         | —                          | 186 (4)                    | 1372 (35)                  | 649 (19)                 |
| 30 to <40                                          | 1489 (7)             | —                       | —                         | —                          | —                          | 718 (18)                   | 771 (22)                 |
| 40 to <49                                          | 985 (4)              | —                       | —                         | —                          | —                          | 153 (4)                    | 832 (24)                 |
| ≥50                                                | 516 (2)              | —                       | —                         | —                          | —                          | —                          | 516 (15)                 |
| BMI z-score, <sup>a</sup> mean ± SD                | 0.4 ± 1.0            | 0.8 ± 1.1               | 0.6 ± 1.2                 | 0.8 ± 1.0                  | 0.2 ± 1.0                  | 0.09 ± 0.8                 | −0.1 ± 0.8               |
| BMI group, <sup>b</sup> <i>n</i> (%)               |                      |                         |                           |                            |                            |                            |                          |
| Underweight/normal weight                          | 10,577 (51)          | 239 (59)                | 2457 (67)                 | 3793 (58)                  | 2183 (52)                  | 1002 (31)                  | 903 (33)                 |
| Overweight                                         | 6022 (29)            | 98 (24)                 | 728 (20)                  | 1651 (25)                  | 1334 (32)                  | 1169 (36)                  | 1042 (38)                |
| Obese                                              | 4227 (20)            | 68 (17)                 | 466 (13)                  | 1122 (17)                  | 679 (16)                   | 1074 (33)                  | 818 (30)                 |

(continued)

SUPPLEMENTARY TABLE S1. (CONTINUED)

|                                                                       | Overall,<br>N=22,697 | 1–5 years old,<br>N=415 | 6–12 years old,<br>N=3688 | 13–17 years old,<br>N=6675 | 18–25 years old,<br>N=4535 | 26–49 years old,<br>N=3939 | ≥50 years old,<br>N=3445 |
|-----------------------------------------------------------------------|----------------------|-------------------------|---------------------------|----------------------------|----------------------------|----------------------------|--------------------------|
| <b>Diabetes management</b>                                            |                      |                         |                           |                            |                            |                            |                          |
| Pump use, <sup>a</sup> <i>n</i> (%)                                   | 14,047 (63)          | 233 (64)                | 2403 (68)                 | 4040 (62)                  | 2700 (60)                  | 2542 (66)                  | 2129 (62)                |
| CGM use, <sup>a</sup> <i>n</i> (%)                                    | 6547 (30)            | 183 (51)                | 1302 (37)                 | 1553 (24)                  | 963 (22)                   | 1402 (37)                  | 1144 (34)                |
| Self-monitoring of blood glucose, <sup>c</sup> mean ± SD              | 4.1 ± 2.4            | 6.4 ± 2.4               | 5.5 ± 2.3                 | 3.8 ± 2.2                  | 3.3 ± 2.4                  | 3.9 ± 2.4                  | 4.6 ± 2.3                |
| 0–3 times per day, <i>n</i> (%)                                       | 5402 (41)            | 10 (6)                  | 295 (14)                  | 2062 (46)                  | 1641 (58)                  | 885 (45)                   | 509 (28)                 |
| 4–6 times per day, <i>n</i> (%)                                       | 5947 (45)            | 85 (53)                 | 1139 (56)                 | 1912 (43)                  | 946 (33)                   | 861 (44)                   | 1004 (55)                |
| 6–9 times per day, <i>n</i> (%)                                       | 1508 (11)            | 48 (30)                 | 482 (24)                  | 384 (9)                    | 184 (6)                    | 163 (8)                    | 247 (13)                 |
| ≥10 times per day, <i>n</i> (%)                                       | 448 (3)              | 17 (11)                 | 133 (6)                   | 91 (2)                     | 66 (2)                     | 66 (3)                     | 75 (4)                   |
| <b>Noninsulin medications for blood glucose control, <i>n</i> (%)</b> |                      |                         |                           |                            |                            |                            |                          |
| Metformin                                                             | 811 (4)              | 0                       | 12 (<1)                   | 185 (3)                    | 171 (4)                    | 257 (7)                    | 186 (5)                  |
| GLP-1 agonist                                                         | 300 (1)              | 0                       | 0                         | 8 (<1)                     | 27 (<1)                    | 163 (4)                    | 102 (3)                  |
| DPP-IVi                                                               | 9 (<1)               | 0                       | 0                         | 0                          | 0                          | 4 (<1)                     | 5 (<1)                   |
| SGLT2i                                                                | 232 (1)              | 0                       | 0                         | 1 (<1)                     | 14 (<1)                    | 119 (3)                    | 98 (3)                   |
| Pramlintide                                                           | 131 (>1)             | 0                       | 0                         | 3 (<1)                     | 9 (<1)                     | 52 (1)                     | 67 (2)                   |
| Other <sup>d</sup>                                                    | 28 (<1)              | 0                       | 0                         | 2 (<1)                     | 2 (<1)                     | 10 (<1)                    | 14 (<1)                  |

<sup>a</sup>Thirty-nine transgender participants; race/ethnicity information missing for 167 participants; annual income missing for 6069 participants; education information missing for 1366 participants; insurance status information missing for 1087 participants; BMI information missing for 1872 participants; insulin modality (pump use) information missing for 528 participants; information on use of CGM missing for 899 participants| parental education level used for participants <18 years old.

<sup>b</sup>Underweight/normal weight defined as <85th BMI percentile adjusted for age and sex for participants <20 years and BMI <25 for adults ≥20 years, overweight defined as 85th to <95th BMI percentile for participants <20 years and BMI 25 to <30 for adults ≥20 years, obese defined as ≥95th BMI percentile for participants <20 years and BMI ≥30 for adults ≥20 years; age and sex adjusted.

<sup>c</sup>SMBG available for 13,344 participants not using a continuous glucose monitor.

<sup>d</sup>Includes thiazolidinediones and sulfonylureas.

BMI, body mass index; CGM, continuous glucose monitoring; IQR, interquartile range; SD, standard deviation; SMBG, self-monitoring of blood glucose.
