# Supplementary material
Source: PubMed Central journal article supplement (PMC7061293)
Supplement: Supp_Table2.pdf [file Supp_Table2.pdf]

SUPPLEMENTARY TABLE S2. PARTICIPANT CHARACTERISTICS: 2010–2012 VERSUS 2016–2018

|                                                                | 2010–2012, N=25,529 | 2016–2018, <sup>a</sup> N=22,697 |
|----------------------------------------------------------------|---------------------|----------------------------------|
| Age, years, mean ± SD                                          | 22 ± 17             | 26 ± 18                          |
| Female, <i>n</i> (%)                                           | 12,706 (50)         | 11,394 (50)                      |
| Non-Hispanic white, <i>n</i> (%)                               | 20,954 (82)         | 18,368 (82)                      |
| Private insurance, <i>n</i> (%)                                | 17,081 (75)         | 16,028 (74)                      |
| Duration of diabetes, median (IQR)                             | 6 (2–14)            | 10 (6–19)                        |
| BMI z-score, mean ± SD                                         | 0.4 ± 1.0           | 0.4 ± 1.0                        |
| Pump use, <i>n</i> (%)                                         | 12,637 (57)         | 14,047 (63)                      |
| CGM use, <i>n</i> (%)                                          | 1591 (7)            | 6547 (30)                        |
| Self-monitoring of blood glucose, <sup>b</sup> mean ± SD       | 4.7 ± 3.0           | 4.1 ± 2.4                        |
| Noninsulin medications for blood glucose control, <i>n</i> (%) |                     |                                  |
| Metformin                                                      | 388 (2)             | 811 (4)                          |
| GLP-1 agonist                                                  | 34 (<1)             | 300 (1)                          |
| DPP-IVi                                                        | 9 (<1)              | 9 (<1)                           |
| SGLT2i                                                         | 0                   | 232 (1)                          |
| Pramlintide                                                    | 124 (<1)            | 131 (<1)                         |
| Other <sup>c</sup>                                             | 24 (<1)             | 28 (<1)                          |

<sup>a</sup>Twelve thousand seven hundred five (56%) participants in the 2016–2018 cohort, also in the 2010–2012 cohort.

<sup>b</sup>Calculation excludes participants using CGM.

<sup>c</sup>Includes thiazolidinediones and sulfonylureas.
