# Supplementary material
Source: PubMed Central journal article supplement (PMC7061293)
Supplement: Supp_Table3.pdf [file Supp_Table3.pdf]

SUPPLEMENTARY TABLE S3. USE OF TECHNOLOGY BY RACE/ETHNICITY: 2016–2018

|                         | Age, years         |                    |                    |                    |                    |                    |                    |                    |                    |
|-------------------------|--------------------|--------------------|--------------------|--------------------|--------------------|--------------------|--------------------|--------------------|--------------------|
|                         | <13                |                    |                    | 13–25              |                    |                    | ≥26                |                    |                    |
|                         | White non-Hispanic | Black non-Hispanic | Hispanic or Latino | White non-Hispanic | Black non-Hispanic | Hispanic or Latino | White non-Hispanic | Black non-Hispanic | Hispanic or Latino |
| Pump use, <i>n</i> (%)  |                    |                    |                    |                    |                    |                    |                    |                    |                    |
| Annual household income |                    |                    |                    |                    |                    |                    |                    |                    |                    |
| <\$50,000               | 398 (59)           | 37 (37)            | 69 (45)            | 782 (50)           | 65 (25)            | 67 (45)            | 789 (62)           | 40 (29)            | 46 (49)            |
| \$50,000 to <\$75,000   | 294 (72)           | 9 (41)             | 34 (68)            | 696 (68)           | 16 (28)            | 31 (50)            | 600 (65)           | 21 (51)            | 17 (68)            |
| ≥\$75,000               | 1011 (81)          | 22 (73)            | 62 (72)            | 2724 (74)          | 47 (52)            | 128 (72)           | 1902 (70)          | 39 (64)            | 50 (76)            |
| CGM use, <i>n</i> (%)   |                    |                    |                    |                    |                    |                    |                    |                    |                    |
| Annual household income |                    |                    |                    |                    |                    |                    |                    |                    |                    |
| <\$50,000               | 172 (26)           | 8 (8)              | 21 (14)            | 227 (15)           | 14 (5)             | 43 (10)            | 312 (25)           | 13 (10)            | 15 (16)            |
| \$50,000 to <\$75,000   | 172 (43)           | 3 (15)             | 18 (36)            | 225 (22)           | 3 (5)              | 17 (17)            | 315 (35)           | 10 (26)            | 11 (44)            |
| ≥\$75,000               | 658 (54)           | 8 (26)             | 46 (55)            | 1207 (33)          | 8 (9)              | 72 (31)            | 1218 (46)          | 15 (26)            | 33 (51)            |
