# Supplementary material
Source: PubMed Central journal article supplement (PMC7061293)
Supplement: Supp_Table4.pdf [file Supp_Table4.pdf]

SUPPLEMENTARY TABLE S4. ASPECTS OF SELF-REPORTED DIABETES MANAGEMENT IN 2016–2018

|                                                                                                                                              | Overall,<br>N=11,007 | 6–12 years old,<br>N=1312 | 13–17 years<br>old, N=3179 | 18–25 years<br>old, N=2440 | 26–49 years<br>old, N=2122 | ≥50 years old,<br>N=1953 |
|----------------------------------------------------------------------------------------------------------------------------------------------|----------------------|---------------------------|----------------------------|----------------------------|----------------------------|--------------------------|
| <b>Insulin use</b>                                                                                                                           |                      |                           |                            |                            |                            |                          |
| Timing of insulin bolus, <i>n</i> (%)                                                                                                        |                      |                           |                            |                            |                            |                          |
| At least several minutes before the meal                                                                                                     | 2671 (24)            | 359 (27)                  | 626 (20)                   | 419 (17)                   | 544 (26)                   | 723 (37)                 |
| Immediately before the meal                                                                                                                  | 4822 (44)            | 579 (44)                  | 1491 (47)                  | 1009 (41)                  | 944 (44)                   | 798 (41)                 |
| During the meal                                                                                                                              | 1178 (11)            | 105 (8)                   | 351 (11)                   | 339 (14)                   | 262 (12)                   | 121 (6)                  |
| After the meal                                                                                                                               | 2336 (21)            | 269 (21)                  | 711 (22)                   | 673 (28)                   | 372 (18)                   | 311 (16)                 |
| Frequency of use of insulin pump features to decide insulin dose based on carbohydrate intake, <i>n</i> (%)                                  |                      |                           |                            |                            |                            |                          |
| Always                                                                                                                                       | 4892 (65)            | 699 (70)                  | 1462 (66)                  | 1063 (66)                  | 859 (59)                   | 809 (64)                 |
| Sometimes                                                                                                                                    | 1151 (15)            | 100 (10)                  | 240 (11)                   | 257 (16)                   | 326 (22)                   | 228 (18)                 |
| Rarely                                                                                                                                       | 441 (6)              | 32 (3)                    | 102 (5)                    | 96 (6)                     | 141 (10)                   | 70 (6)                   |
| Never                                                                                                                                        | 1084 (14)            | 166 (17)                  | 415 (19)                   | 197 (12)                   | 141 (10)                   | 165 (13)                 |
| Frequency of use of insulin pump features to decide insulin dose based on elevated glucose values, <i>n</i> (%)                              |                      |                           |                            |                            |                            |                          |
| Always                                                                                                                                       | 4984 (66)            | 675 (68)                  | 1476 (67)                  | 1095 (68)                  | 892 (61)                   | 846 (67)                 |
| Sometimes                                                                                                                                    | 1384 (18)            | 149 (15)                  | 311 (14)                   | 285 (18)                   | 383 (26)                   | 256 (20)                 |
| Rarely                                                                                                                                       | 302 (4)              | 25 (3)                    | 71 (3)                     | 77 (5)                     | 80 (5)                     | 49 (4)                   |
| Never                                                                                                                                        | 898 (12)             | 148 (15)                  | 361 (16)                   | 156 (10)                   | 112 (8)                    | 121 (10)                 |
| Frequency of use of insulin pump features to decide insulin dose based on both carbohydrate intake and elevated glucose values, <i>n</i> (%) |                      |                           |                            |                            |                            |                          |
| Always                                                                                                                                       | 5049 (67)            | 718 (72)                  | 1507 (68)                  | 1093 (68)                  | 864 (59)                   | 867 (68)                 |
| Sometimes                                                                                                                                    | 889 (12)             | 133 (13)                  | 344 (16)                   | 160 (10)                   | 130 (9)                    | 122 (10)                 |
| Rarely                                                                                                                                       | 322 (4)              | 31 (3)                    | 74 (3)                     | 67 (4)                     | 102 (7)                    | 48 (4)                   |
| Never                                                                                                                                        | 1308 (17)            | 115 (12)                  | 294 (13)                   | 293 (18)                   | 371 (25)                   | 235 (18)                 |
| Frequency of missed insulin bolus, <i>n</i> (%)                                                                                              |                      |                           |                            |                            |                            |                          |
| Never                                                                                                                                        | 3330 (30)            | 541 (41)                  | 810 (25)                   | 535 (22)                   | 670 (32)                   | 774 (40)                 |
| Once a month or less                                                                                                                         | 3411 (31)            | 430 (33)                  | 894 (28)                   | 687 (28)                   | 736 (35)                   | 664 (34)                 |
| Once a week or less                                                                                                                          | 1867 (17)            | 165 (13)                  | 595 (19)                   | 501 (21)                   | 339 (16)                   | 267 (14)                 |
| 2 days per week                                                                                                                              | 1335 (12)            | 112 (9)                   | 482 (15)                   | 376 (15)                   | 225 (11)                   | 140 (7)                  |
| 3–4 days per week                                                                                                                            | 572 (5)              | 28 (2)                    | 208 (7)                    | 191 (8)                    | 88 (4)                     | 56 (3)                   |
| 5–6 days per week                                                                                                                            | 143 (1)              | 10 (<1)                   | 53 (2)                     | 41 (2)                     | 20 (<1)                    | 19 (<1)                  |
| At least once a day                                                                                                                          | 351 (3)              | 24 (2)                    | 138 (4)                    | 112 (5)                    | 47 (2)                     | 30 (2)                   |
| Frequency of missed basal for injection users, <sup>a</sup> <i>n</i> (%)                                                                     |                      |                           |                            |                            |                            |                          |
| Never                                                                                                                                        | 2125 (61)            | 248 (79)                  | 575 (60)                   | 397 (48)                   | 417 (62)                   | 487 (70)                 |
| Once a month or less                                                                                                                         | 911 (26)             | 53 (17)                   | 240 (25)                   | 265 (32)                   | 187 (28)                   | 166 (24)                 |
| Once a week or less                                                                                                                          | 214 (6)              | 8 (3)                     | 65 (7)                     | 77 (9)                     | 34 (5)                     | 30 (4)                   |
| 2 days per week                                                                                                                              | 119 (3)              | 2 (<1)                    | 52 (5)                     | 46 (6)                     | 15 (2)                     | 4 (<1)                   |
| 3–4 days per week                                                                                                                            | 37 (1)               | 0 (0)                     | 7 (<1)                     | 18 (2)                     | 7 (1)                      | 5 (<1)                   |
| 5–6 days per week                                                                                                                            | 7 (<1)               | 2 (<1)                    | 2 (<1)                     | 2 (<1)                     | 1 (<1)                     | 0 (0)                    |
| At least once a day                                                                                                                          | 67 (2)               | 2 (<1)                    | 22 (2)                     | 27 (3)                     | 8 (1)                      | 8 (1)                    |
| Duration of infusion set wear, days, mean ± SD                                                                                               | 3.1 ± 0.8            | 2.8 ± 0.6                 | 2.9 ± 0.7                  | 3.2 ± 0.8                  | 3.4 ± 0.9                  | 3.3 ± 0.9                |

(continued)

SUPPLEMENTARY TABLE S4. (CONTINUED)

|                                                                                            | Overall,<br>N=11,007 | 6–12 years old,<br>N=1312 | 13–17 years<br>old, N=3179 | 18–25 years<br>old, N=2440 | 26–49 years<br>old, N=2122 | ≥50 years old,<br>N=1953 |
|--------------------------------------------------------------------------------------------|----------------------|---------------------------|----------------------------|----------------------------|----------------------------|--------------------------|
| <b>Glucose monitoring</b>                                                                  |                      |                           |                            |                            |                            |                          |
| Frequency of deciding amount of insulin bolus based only on CGM, <sup>b</sup> <i>n</i> (%) |                      |                           |                            |                            |                            |                          |
| Always                                                                                     | 277 (7)              | 22 (4)                    | 52 (6)                     | 48 (7)                     | 99 (10)                    | 56 (8)                   |
| Most of the time                                                                           | 1154 (30)            | 114 (21)                  | 217 (24)                   | 232 (35)                   | 374 (39)                   | 217 (29)                 |
| Sometimes                                                                                  | 1201 (31)            | 187 (34)                  | 306 (34)                   | 206 (31)                   | 278 (29)                   | 224 (30)                 |
| Rarely                                                                                     | 671 (18)             | 116 (21)                  | 177 (19)                   | 113 (17)                   | 130 (14)                   | 135 (18)                 |
| Never                                                                                      | 510 (13)             | 112 (20)                  | 156 (17)                   | 58 (9)                     | 70 (7)                     | 114 (15)                 |
| Adjust insulin dose based on trend arrows on CGM, <sup>b</sup> <i>n</i> (%)                | 2870 (75)            | 400 (72)                  | 634 (70)                   | 533 (81)                   | 773 (81)                   | 530 (71)                 |
| <b>Ketone monitoring</b>                                                                   |                      |                           |                            |                            |                            |                          |
| Method of ketone checking, <i>n</i> (%)                                                    |                      |                           |                            |                            |                            |                          |
| Blood                                                                                      | 943 (9)              | 273 (21)                  | 368 (12)                   | 194 (8)                    | 54 (3)                     | 54 (3)                   |
| Urine                                                                                      | 5233 (47)            | 809 (62)                  | 2090 (66)                  | 1383 (57)                  | 575 (27)                   | 376 (19)                 |
| Sometimes blood and sometimes urine                                                        | 333 (3)              | 59 (4)                    | 144 (5)                    | 89 (4)                     | 23 (1)                     | 18 (<1)                  |
| Rarely check for ketones with blood or urine                                               | 1724 (16)            | 119 (9)                   | 366 (11)                   | 415 (17)                   | 443 (21)                   | 380 (19)                 |
| Never check for ketones                                                                    | 2828 (26)            | 53 (4)                    | 215 (7)                    | 364 (15)                   | 1048 (49)                  | 1148 (58)                |
| Has a blood-ketone meter at home, <i>n</i> (%)                                             | 2230 (20)            | 490 (37)                  | 840 (26)                   | 605 (25)                   | 173 (8)                    | 122 (6)                  |
| Has urine ketone strips at home, <i>n</i> (%)                                              | 7838 (71)            | 1116 (85)                 | 2809 (88)                  | 2084 (85)                  | 1069 (50)                  | 759 (38)                 |
| Frequency of checking ketones via blood in a 30-day period, days,<br>median (IQR)          | 0 (0–0)              | 0 (0–0)                   | 0 (0–0)                    | 0 (0–0)                    | 0 (0–0)                    | 0 (0–0)                  |
| Frequency of checking ketones via urine in a 30-day period, days,<br>median (IQR)          | 0 (0–1)              | 0 (0–3)                   | 0 (0–2)                    | 0 (0–1)                    | 0 (0–0)                    | 0 (0–0)                  |
| <b>HbA1c goals</b>                                                                         |                      |                           |                            |                            |                            |                          |
| Participant reported having an HbA1c goal, <i>n</i> (%)                                    | 10046 (91)           | 1185 (90)                 | 2829 (89)                  | 2223 (91)                  | 2000 (93)                  | 1808 (91)                |
| HbA1c goal, <i>n</i> (%)                                                                   |                      |                           |                            |                            |                            |                          |
| <42 mmol/mol (<6%)                                                                         | 670 (7)              | 40 (3)                    | 91 (3)                     | 107 (5)                    | 245 (12)                   | 187 (10)                 |
| <48 mmol/mol (<6.5%)                                                                       | 1387 (14)            | 85 (7)                    | 189 (7)                    | 260 (12)                   | 490 (25)                   | 363 (20)                 |
| <53 mmol/mol (<7.0%)                                                                       | 3949 (39)            | 393 (33)                  | 958 (34)                   | 896 (40)                   | 894 (45)                   | 808 (45)                 |
| <58 mmol/mol (<7.5%)                                                                       | 2391 (24)            | 427 (36)                  | 862 (31)                   | 563 (25)                   | 234 (12)                   | 305 (17)                 |
| <64 mmol/mol (<8.0%)                                                                       | 1087 (11)            | 189 (16)                  | 442 (16)                   | 252 (11)                   | 100 (5)                    | 104 (6)                  |
| <69 mmol/mol (<8.5%)                                                                       | 404 (4)              | 38 (3)                    | 203 (7)                    | 107 (5)                    | 27 (1)                     | 28 (2)                   |
| ≥69 mmol/mol (≥8.5%)                                                                       | 112 (1)              | 6 (<1)                    | 60 (2)                     | 34 (2)                     | 6 (<1)                     | 6 (<1)                   |
| <b>Use of glucagon, <i>n</i> (%)</b>                                                       |                      |                           |                            |                            |                            |                          |
| Used glucagon in prior 3 months to treat severe hypoglycemia                               | 331 (3)              | 30 (2)                    | 81 (3)                     | 52 (2)                     | 53 (2)                     | 115 (6)                  |
| Used glucagon in small doses in prior 3 months before or during<br>exercise                | 36 (<1)              | 3 (<1)                    | 18 (<1)                    | 7 (<1)                     | 4 (<1)                     | 4 (<1)                   |
| Used glucagon in small doses in prior 3 months in place of<br>carbohydrates                | 29 (<1)              | 8 (<1)                    | 9 (<1)                     | 6 (<1)                     | 2 (<1)                     | 4 (<1)                   |

(continued)

SUPPLEMENTARY TABLE S4. (CONTINUED)

|                                                                                                             | Overall,<br>N=11,007 | 6–12 years old,<br>N=1312 | 13–17 years<br>old, N=3179 | 18–25 years<br>old, N=2440 | 26–49 years<br>old, N=2122 | ≥50 years old,<br>N=1953 |
|-------------------------------------------------------------------------------------------------------------|----------------------|---------------------------|----------------------------|----------------------------|----------------------------|--------------------------|
| Device downloading                                                                                          |                      |                           |                            |                            |                            |                          |
| Frequency of downloading blood glucose meter outside of doctor's office: non-CGM users, <sup>bc</sup> n (%) |                      |                           |                            |                            |                            |                          |
| Never                                                                                                       | 5750 (71)            | 529 (62)                  | 1590 (63)                  | 1420 (72)                  | 1115 (78)                  | 1095 (81)                |
| <1 time a year                                                                                              | 461 (6)              | 53 (6)                    | 137 (5)                    | 145 (7)                    | 84 (6)                     | 42 (3)                   |
| Once a year                                                                                                 | 246 (3)              | 34 (4)                    | 79 (3)                     | 74 (4)                     | 37 (3)                     | 22 (2)                   |
| A few times a year                                                                                          | 877 (11)             | 134 (16)                  | 337 (13)                   | 196 (10)                   | 107 (7)                    | 103 (8)                  |
| Once a month                                                                                                | 446 (5)              | 57 (7)                    | 207 (8)                    | 85 (4)                     | 47 (3)                     | 50 (4)                   |
| 2–3 times per month                                                                                         | 174 (2)              | 28 (3)                    | 85 (3)                     | 28 (1)                     | 17 (1)                     | 16 (1)                   |
| Once a week                                                                                                 | 105 (1)              | 14 (2)                    | 43 (2)                     | 16 (<1)                    | 16 (1)                     | 16 (1)                   |
| 2–5 times per week                                                                                          | 26 (<1)              | 4 (<1)                    | 14 (<1)                    | 2 (<1)                     | 4 (<1)                     | 2 (<1)                   |
| 6–7 times per week                                                                                          | 47 (<1)              | 5 (<1)                    | 19 (<1)                    | 8 (<1)                     | 6 (<1)                     | 9 (<1)                   |
| Frequency of downloading blood glucose meter outside of doctor's office: CGM users, <sup>bc</sup> n (%)     |                      |                           |                            |                            |                            |                          |
| Never                                                                                                       | 1585 (60)            | 205 (51)                  | 289 (51)                   | 246 (59)                   | 464 (69)                   | 381 (67)                 |
| <1 time a year                                                                                              | 172 (7)              | 18 (5)                    | 41 (7)                     | 36 (9)                     | 45 (7)                     | 32 (6)                   |
| Once a year                                                                                                 | 95 (4)               | 14 (4)                    | 24 (4)                     | 25 (6)                     | 15 (2)                     | 17 (3)                   |
| A few times a year                                                                                          | 420 (16)             | 82 (21)                   | 114 (20)                   | 69 (17)                    | 88 (13)                    | 67 (12)                  |
| Once a month                                                                                                | 217 (8)              | 47 (12)                   | 63 (11)                    | 28 (7)                     | 40 (6)                     | 39 (7)                   |
| 2–3 times per month                                                                                         | 85 (3)               | 21 (5)                    | 22 (4)                     | 10 (2)                     | 13 (2)                     | 19 (3)                   |
| Once a week                                                                                                 | 40 (2)               | 9 (2)                     | 15 (3)                     | 2 (<1)                     | 5 (<1)                     | 9 (2)                    |
| 2–5 times per week                                                                                          | 6 (<1)               | 0 (0)                     | 3 (<1)                     | 1 (<1)                     | 1 (<1)                     | 1 (<1)                   |
| 6–7 times per week                                                                                          | 12 (<1)              | 4 (1)                     | 0 (0)                      | 0 (0)                      | 5 (<1)                     | 3 (<1)                   |
| Reason for infrequent meter downloading (< once a month), <sup>d</sup> n (%)                                |                      |                           |                            |                            |                            |                          |
| Do not own computer                                                                                         | 564 (6)              | 99 (9)                    | 143 (5)                    | 106 (5)                    | 106 (5)                    | 110 (6)                  |
| Did not know it was possible to download                                                                    | 1127 (12)            | 98 (9)                    | 365 (14)                   | 277 (13)                   | 198 (10)                   | 189 (11)                 |
| Did not know how to download                                                                                | 2097 (22)            | 187 (17)                  | 536 (21)                   | 474 (21)                   | 381 (19)                   | 519 (30)                 |
| Download too hard to understand                                                                             | 444 (5)              | 53 (5)                    | 148 (6)                    | 67 (3)                     | 79 (4)                     | 97 (6)                   |
| Takes too much time                                                                                         | 2133 (22)            | 187 (17)                  | 531 (20)                   | 566 (26)                   | 566 (26)                   | 283 (16)                 |
| Meter software not compatible with computer                                                                 | 891 (9)              | 117 (11)                  | 254 (10)                   | 214 (10)                   | 153 (8)                    | 153 (9)                  |
| Get blood glucose downloads from pump                                                                       | 1784 (19)            | 230 (22)                  | 516 (20)                   | 406 (18)                   | 347 (18)                   | 285 (16)                 |
| Prefer written records                                                                                      | 1236 (13)            | 173 (16)                  | 360 (14)                   | 259 (12)                   | 187 (10)                   | 257 (15)                 |
| Do not find data useful                                                                                     | 856 (9)              | 53 (5)                    | 174 (7)                    | 244 (11)                   | 222 (11)                   | 163 (9)                  |
| Frequency of downloading CGM data outside doctor's office, <sup>b</sup> n (%)                               |                      |                           |                            |                            |                            |                          |
| Never                                                                                                       | 2278 (51)            | 262 (42)                  | 571 (50)                   | 421 (51)                   | 552 (52)                   | 472 (57)                 |
| <1 time per year                                                                                            | 280 (6)              | 33 (5)                    | 64 (6)                     | 62 (8)                     | 76 (7)                     | 45 (5)                   |
| Once a year                                                                                                 | 144 (3)              | 14 (2)                    | 30 (3)                     | 34 (4)                     | 43 (4)                     | 23 (3)                   |
| A few times a year                                                                                          | 670 (15)             | 126 (20)                  | 169 (15)                   | 119 (15)                   | 161 (15)                   | 95 (11)                  |
| Once a month                                                                                                | 576 (13)             | 100 (16)                  | 157 (14)                   | 96 (12)                    | 127 (12)                   | 96 (12)                  |
| 2–3 times per month                                                                                         | 221 (5)              | 43 (7)                    | 50 (4)                     | 37 (5)                     | 48 (5)                     | 43 (5)                   |
| Once a week                                                                                                 | 153 (3)              | 27 (4)                    | 54 (5)                     | 15 (2)                     | 25 (2)                     | 32 (4)                   |
| More than once a week                                                                                       | 38 (<1)              | 8 (1)                     | 12 (1)                     | 6 (<1)                     | 8 (<1)                     | 4 (<1)                   |
| Every day                                                                                                   | 125 (3)              | 18 (3)                    | 37 (3)                     | 29 (4)                     | 22 (2)                     | 19 (2)                   |

(continued)

SUPPLEMENTARY TABLE S4. (CONTINUED)

|                                                                                        | Overall,<br>N=11,007 | 6–12 years old,<br>N=1312 | 13–17 years<br>old, N=3179 | 18–25 years<br>old, N=2440 | 26–49 years<br>old, N=2122 | ≥50 years old,<br>N=1953 |
|----------------------------------------------------------------------------------------|----------------------|---------------------------|----------------------------|----------------------------|----------------------------|--------------------------|
| Reason for infrequent CGM downloading (<once a month), <sup>d</sup> n (%)              |                      |                           |                            |                            |                            |                          |
| Do not own computer                                                                    | 169 (5)              | 26 (6)                    | 46 (6)                     | 24 (4)                     | 39 (5)                     | 34 (5)                   |
| Did not know it was possible to download                                               | 388 (12)             | 49 (11)                   | 134 (16)                   | 82 (13)                    | 60 (7)                     | 63 (10)                  |
| Did not know how to download                                                           | 790 (23)             | 102 (23)                  | 218 (26)                   | 138 (22)                   | 158 (19)                   | 174 (27)                 |
| Download too hard to understand                                                        | 233 (7)              | 32 (7)                    | 58 (7)                     | 35 (6)                     | 54 (6)                     | 54 (9)                   |
| Takes too much time                                                                    | 1139 (34)            | 129 (30)                  | 241 (29)                   | 232 (36)                   | 366 (44)                   | 171 (27)                 |
| CGM software not compatible with computer                                              | 360 (11)             | 37 (9)                    | 59 (7)                     | 77 (12)                    | 101 (12)                   | 86 (14)                  |
| Prefer written records                                                                 | 351 (10)             | 67 (15)                   | 98 (12)                    | 68 (11)                    | 53 (6)                     | 65 (10)                  |
| Do not find data useful                                                                | 323 (10)             | 25 (6)                    | 69 (8)                     | 66 (10)                    | 91 (11)                    | 72 (11)                  |
| Frequency of downloading insulin pump data outside doctor's office, <sup>a</sup> n (%) |                      |                           |                            |                            |                            |                          |
| Never                                                                                  | 4587 (60)            | 456 (45)                  | 1148 (50)                  | 1054 (64)                  | 1017 (69)                  | 912 (71)                 |
| <1 time per year                                                                       | 503 (7)              | 62 (6)                    | 162 (7)                    | 134 (8)                    | 94 (6)                     | 51 (4)                   |
| Once a year                                                                            | 273 (4)              | 40 (4)                    | 83 (4)                     | 70 (4)                     | 45 (3)                     | 35 (3)                   |
| A few times a year                                                                     | 1173 (15)            | 228 (23)                  | 418 (18)                   | 213 (13)                   | 173 (12)                   | 141 (11)                 |
| Once a month                                                                           | 756 (10)             | 134 (13)                  | 310 (14)                   | 130 (8)                    | 94 (6)                     | 88 (7)                   |
| 2–3 times per month                                                                    | 251 (3)              | 55 (5)                    | 108 (5)                    | 29 (2)                     | 28 (2)                     | 31 (2)                   |
| Once a week                                                                            | 120 (2)              | 21 (2)                    | 54 (2)                     | 6 (<1)                     | 20 (1)                     | 19 (1)                   |
| More than once a week                                                                  | 15 (<1)              | 2 (<1)                    | 6 (<1)                     | 3 (<1)                     | 3 (<1)                     | 1 (<1)                   |
| Every day                                                                              | 24 (<1)              | 6 (<1)                    | 6 (<1)                     | 3 (<1)                     | 4 (<1)                     | 5 (<1)                   |
| Reason for infrequent insulin pump downloading (<once a month), <sup>d</sup> n (%)     |                      |                           |                            |                            |                            |                          |
| Do not own computer                                                                    | 356 (5)              | 69 (9)                    | 95 (5)                     | 58 (4)                     | 66 (5)                     | 68 (6)                   |
| Did not know it was possible to download                                               | 571 (9)              | 43 (5)                    | 169 (9)                    | 142 (10)                   | 102 (8)                    | 115 (10)                 |
| Did not know how to download                                                           | 1584 (24)            | 155 (20)                  | 432 (24)                   | 322 (22)                   | 295 (22)                   | 380 (33)                 |
| Download too hard to understand                                                        | 441 (7)              | 61 (8)                    | 146 (8)                    | 73 (5)                     | 76 (6)                     | 85 (7)                   |
| Takes too much time                                                                    | 2170 (33)            | 226 (29)                  | 607 (34)                   | 542 (37)                   | 535 (40)                   | 260 (23)                 |
| Insulin pump software not compatible with computer                                     | 771 (12)             | 117 (15)                  | 201 (11)                   | 185 (13)                   | 143 (11)                   | 125 (11)                 |
| Prefer written records                                                                 | 725 (11)             | 136 (17)                  | 212 (12)                   | 154 (10)                   | 95 (7)                     | 128 (11)                 |
| Do not find data useful                                                                | 682 (10)             | 60 (8)                    | 146 (8)                    | 200 (14)                   | 154 (12)                   | 122 (11)                 |
| Use a mobile medical application to assist with diabetes care, n (%)                   | 1799 (16)            | 303 (23)                  | 566 (18)                   | 425 (17)                   | 334 (16)                   | 171 (9)                  |
| Tasks performed using mobile medical application, <sup>d</sup> n (%)                   |                      |                           |                            |                            |                            |                          |
| View glucose meter data                                                                | 352 (20)             | 42 (14)                   | 116 (20)                   | 84 (20)                    | 62 (19)                    | 48 (28)                  |
| View CGM data                                                                          | 1298 (72)            | 248 (82)                  | 416 (73)                   | 280 (66)                   | 243 (73)                   | 111 (65)                 |
| View insulin pump data                                                                 | 175 (10)             | 31 (10)                   | 56 (10)                    | 30 (7)                     | 26 (8)                     | 32 (19)                  |
| Manage patterns and adjust insulin                                                     | 400 (22)             | 67 (22)                   | 103 (18)                   | 97 (23)                    | 83 (25)                    | 50 (29)                  |
| Share results with health care provider                                                | 409 (23)             | 66 (22)                   | 108 (19)                   | 82 (19)                    | 87 (26)                    | 66 (39)                  |
| Share results with family members                                                      | 485 (27)             | 124 (41)                  | 193 (34)                   | 94 (22)                    | 43 (13)                    | 31 (18)                  |
| Record foods                                                                           | 226 (13)             | 19 (6)                    | 49 (9)                     | 84 (20)                    | 54 (16)                    | 20 (12)                  |
| Track exercise                                                                         | 207 (12)             | 9 (3)                     | 34 (6)                     | 70 (16)                    | 68 (20)                    | 26 (15)                  |

(continued)

SUPPLEMENTARY TABLE S4. (CONTINUED)

|                                                                                                        | Overall,<br>N=11,007 | 6–12 years old,<br>N=1312 | 13–17 years<br>old, N=3179 | 18–25 years<br>old, N=2440 | 26–49 years<br>old, N=2122 | ≥50 years old,<br>N=1953 |
|--------------------------------------------------------------------------------------------------------|----------------------|---------------------------|----------------------------|----------------------------|----------------------------|--------------------------|
| Diabetes mobile medical applications used, <sup>d</sup> <i>n</i> (%)                                   |                      |                           |                            |                            |                            |                          |
| Dexcom Share                                                                                           | 1218 (68)            | 239 (79)                  | 408 (72)                   | 267 (63)                   | 211 (63)                   | 93 (54)                  |
| Medtronic Connect                                                                                      | 135 (8)              | 19 (6)                    | 33 (6)                     | 25 (6)                     | 36 (11)                    | 22 (13)                  |
| Glooko                                                                                                 | 73 (4)               | 13 (4)                    | 25 (4)                     | 13 (3)                     | 14 (4)                     | 8 (5)                    |
| Tidepool                                                                                               | 44 (2)               | 2 (<1)                    | 5 (<1)                     | 10 (2)                     | 18 (5)                     | 9 (5)                    |
| mySugr                                                                                                 | 91 (5)               | 8 (3)                     | 27 (5)                     | 37 (9)                     | 16 (5)                     | 3 (2)                    |
| Hypoglycemia awareness                                                                                 |                      |                           |                            |                            |                            |                          |
| Awareness of beginning to experience low blood sugar (0=Never aware and 5= Always aware), median (IQR) | 4 (3–5)              | 4 (3–4)                   | 4 (4–5)                    | 4 (4–5)                    | 4 (3–5)                    | 4 (3–5)                  |
| Level of blood sugar before feel of symptoms, <i>n</i> (%)                                             |                      |                           |                            |                            |                            |                          |
| At least 3 · 9 mmol/L (70 mg/dL)                                                                       | 4637 (42)            | 534 (41)                  | 1628 (51)                  | 1271 (52)                  | 712 (33)                   | 492 (25)                 |
| 3 · 3–3 · 8 mmol/L (60–69 mg/dL)                                                                       | 3670 (33)            | 439 (33)                  | 1009 (32)                  | 835 (34)                   | 791 (37)                   | 596 (30)                 |
| 2 · 8–3 · 3 mmol/L (50–59 mg/dL)                                                                       | 1788 (16)            | 225 (17)                  | 399 (13)                   | 264 (11)                   | 429 (20)                   | 470 (24)                 |
| 2 · 2–2 · 7 mmol/L (40–49 mg/dL)                                                                       | 538 (5)              | 69 (5)                    | 80 (3)                     | 45 (2)                     | 121 (6)                    | 223 (11)                 |
| <2 · 2 mmol/L (<40 mg/dL)                                                                              | 320 (3)              | 33 (3)                    | 51 (2)                     | 22 (<1)                    | 69 (3)                     | 145 (7)                  |
| Never feel symptoms                                                                                    | 108 (<1)             | 13 (<1)                   | 16 (<1)                    | 8 (<1)                     | 21 (<1)                    | 50 (3)                   |

<sup>a</sup>*N*=7568 participants reported insulin pump use; *N*=3480 reported multiple daily injection use.

<sup>b</sup>*N*=3830 participants reported using a CGM; *N*=223 reported using a Medtronic 530G pump/CGM.

<sup>c</sup>*N*=297 participants reported not using a blood glucose meter (*N*=246 non-CGM users | *N*=51 CGM users).

<sup>d</sup>Proportions of each row assessed individually (represent row percentages).
