# Supplementary material
Source: PubMed Central journal article supplement (PMC7061293)
Supplement: Supp_Table5.pdf [file Supp_Table5.pdf]

SUPPLEMENTARY TABLE S5. HbA1c BY PARTICIPANT CHARACTERISTICS: 2016–2018

|                                               | <i>HbA1c,</i><br><i>mean ± SD<sup>a</sup></i> |                                              |                                              |                                              |                                              |                                              | <i>P<sup>b</sup></i> |
|-----------------------------------------------|-----------------------------------------------|----------------------------------------------|----------------------------------------------|----------------------------------------------|----------------------------------------------|----------------------------------------------|----------------------|
|                                               | <i>1–5</i>                                    | <i>6–12</i>                                  | <i>13–17</i>                                 | <i>18–25</i>                                 | <i>26–49</i>                                 | <i>≥50</i>                                   |                      |
|                                               | <i>years</i><br><i>old,</i><br><i>N=415</i>   | <i>years</i><br><i>old,</i><br><i>N=3688</i> | <i>years</i><br><i>old,</i><br><i>N=6675</i> | <i>years</i><br><i>old,</i><br><i>N=4535</i> | <i>years</i><br><i>old,</i><br><i>N=3939</i> | <i>years</i><br><i>old,</i><br><i>N=3445</i> |                      |
| Overall                                       | 66±13.1                                       | 69±15.3                                      | 77±20.8                                      | 74±20.8                                      | 62±16.4                                      | 61±13.1                                      | <0.001               |
| Race/ethnicity                                | 8.2±1.2                                       | 8.5±1.4                                      | 9.2±1.9                                      | 8.9±1.9                                      | 7.8±1.5                                      | 7.7±1.2                                      | <0.001               |
| White non-Hispanic                            | 64±12                                         | 68±14.2                                      | 75±19.7                                      | 72±19.7                                      | 61±14.2                                      | 60±13.1                                      |                      |
| Black non-Hispanic                            | 8.0±1.1                                       | 8.4±1.3                                      | 9.0±1.8                                      | 8.7±1.8                                      | 7.7±1.3                                      | 7.6±1.2                                      |                      |
| Hispanic or Latino                            | 75±16.4                                       | 81±18.6                                      | 92±24                                        | 89±25.1                                      | 77±24                                        | 72±17.5                                      |                      |
| Other                                         | 9.0±1.5                                       | 9.6±1.7                                      | 10.6±2.2                                     | 10.3±2.3                                     | 9.2±2.2                                      | 8.7±1.6                                      |                      |
| Annual household income                       | 68±16.4                                       | 72±15.3                                      | 80±21.9                                      | 79±23                                        | 65±15.3                                      | 62±12                                        |                      |
| <\$50,000                                     | 8.4±1.5                                       | 8.7±1.4                                      | 9.5±2.0                                      | 9.4±2.1                                      | 8.1±1.4                                      | 7.8±1.1                                      |                      |
| \$50,000 to <\$75,000                         | 69±14.2                                       | 73±16.4                                      | 80±21.9                                      | 76±21.9                                      | 64±18.6                                      | 63±14.2                                      |                      |
| ≥\$75,000                                     | 8.5±1.3                                       | 8.8±1.5                                      | 9.5±2.0                                      | 9.1±2.0                                      | 8.0±1.7                                      | 7.9±1.3                                      | <0.001               |
| Pump use                                      | 72±131                                        | 75±16.4                                      | 85±23                                        | 80±23                                        | 66±17.5                                      | 64±14.2                                      |                      |
| Pump                                          | 8.7±1.2                                       | 9.0±1.5                                      | 9.9±2.1                                      | 9.5±2.1                                      | 8.2±1.6                                      | 8.0±1.3                                      |                      |
| Multiple daily injections                     | 64±12                                         | 70±14.2                                      | 77±19.2                                      | 74±19.2                                      | 62±14.2                                      | 61±13.1                                      |                      |
| CGM use                                       | 8.0±1.1                                       | 8.6±1.3                                      | 9.2±1.8                                      | 8.9±1.8                                      | 7.8±1.3                                      | 7.7±1.2                                      |                      |
| CGM user                                      | 61±10.9                                       | 65±12                                        | 73±18.6                                      | 70±18.6                                      | 58±13.1                                      | 58±10.9                                      |                      |
| Non-CGM user                                  | 7.7±1.0                                       | 8.1±1.1                                      | 8.8±1.7                                      | 8.6±1.7                                      | 7.5±1.2                                      | 7.5±1.0                                      | <0.001               |
| Self-monitoring of blood glucose <sup>c</sup> | 63±12                                         | 67±13.1                                      | 74±18.6                                      | 70±17.5                                      | 61±13.1                                      | 60±12                                        |                      |
| 0–3 times per day                             | 7.9±1.1                                       | 8.3±1.2                                      | 8.9±1.7                                      | 8.6±1.6                                      | 7.7±1.2                                      | 7.6±1.1                                      |                      |
| 4–6 times per day                             | 69±14.2                                       | 74±16.4                                      | 83±23                                        | 78±24                                        | 66±18.6                                      | 62±15.3                                      |                      |
| 6–9 times per day                             | 8.5±1.3                                       | 8.9±1.5                                      | 9.7±2.1                                      | 9.3±2.2                                      | 8.2±1.7                                      | 7.8±1.4                                      |                      |
| ≥10 times per day                             | 61±10.9                                       | 64±10.9                                      | 69±16.4                                      | 67±16.4                                      | 57±10.9                                      | 57±10.9                                      | <0.001               |
| 0–3 times per day                             | 7.7±1.0                                       | 8.0±1.0                                      | 8.5±1.5                                      | 8.3±1.5                                      | 7.4±1.0                                      | 7.4±1.0                                      |                      |
| 4–6 times per day                             | 72±13.1                                       | 73±15.3                                      | 80±21.9                                      | 76±21.9                                      | 65±17.5                                      | 62±14.2                                      |                      |
| 6–9 times per day                             | 8.7±1.2                                       | 8.8±1.4                                      | 9.5±2.0                                      | 9.1±2.0                                      | 8.1±1.6                                      | 7.8±1.3                                      |                      |
| ≥10 times per day                             | 81±17.5                                       | 85±20.8                                      | 88±21.9                                      | 81±21.9                                      | 70±19.7                                      | 68±16.4                                      | <0.001               |
| 0–3 times per day                             | 9.6±1.6                                       | 9.9±1.9                                      | 10.2±2.0                                     | 9.6±2.0                                      | 8.6±1.8                                      | 8.4±1.5                                      |                      |
| 4–6 times per day                             | 72±13.1                                       | 73±14.2                                      | 74±17.5                                      | 67±16.4                                      | 62±13.1                                      | 61±12                                        |                      |
| 6–9 times per day                             | 8.7±1.2                                       | 8.8±1.3                                      | 8.9±1.6                                      | 8.3±1.5                                      | 7.8±1.2                                      | 7.7±1.1                                      |                      |
| ≥10 times per day                             | 65±10.9                                       | 68±12                                        | 66±15.3                                      | 63±16.4                                      | 56±10.9                                      | 56±9.8                                       |                      |
| 0–3 times per day                             | 8.1±1.0                                       | 8.4±1.1                                      | 8.2±1.4                                      | 7.9±1.5                                      | 7.3±1.0                                      | 7.3±0.9                                      |                      |
| 4–6 times per day                             | 67±8.7                                        | 64±9.8                                       | 63±9.8                                       | 63±17.5                                      | 55±12                                        | 52±8.7                                       |                      |
| 6–9 times per day                             | 8.3±0.8                                       | 8.0±0.9                                      | 7.9±0.9                                      | 7.9±1.6                                      | 7.2±1.1                                      | 6.9±0.8                                      |                      |

<sup>a</sup>In each cell, HbA1c is expressed as mmol/mol on top and % on bottom.

<sup>b</sup>*P*-value from multivariable linear regression model; annual income was included as an ordinal factor and self-monitoring of blood glucose was included as a continuous factor in the model.

<sup>c</sup>Self-monitoring of blood glucose assessed in non-CGM users.
