# Supplementary material
Source: PubMed Central journal article supplement (PMC7061293)

## Supplementary Data

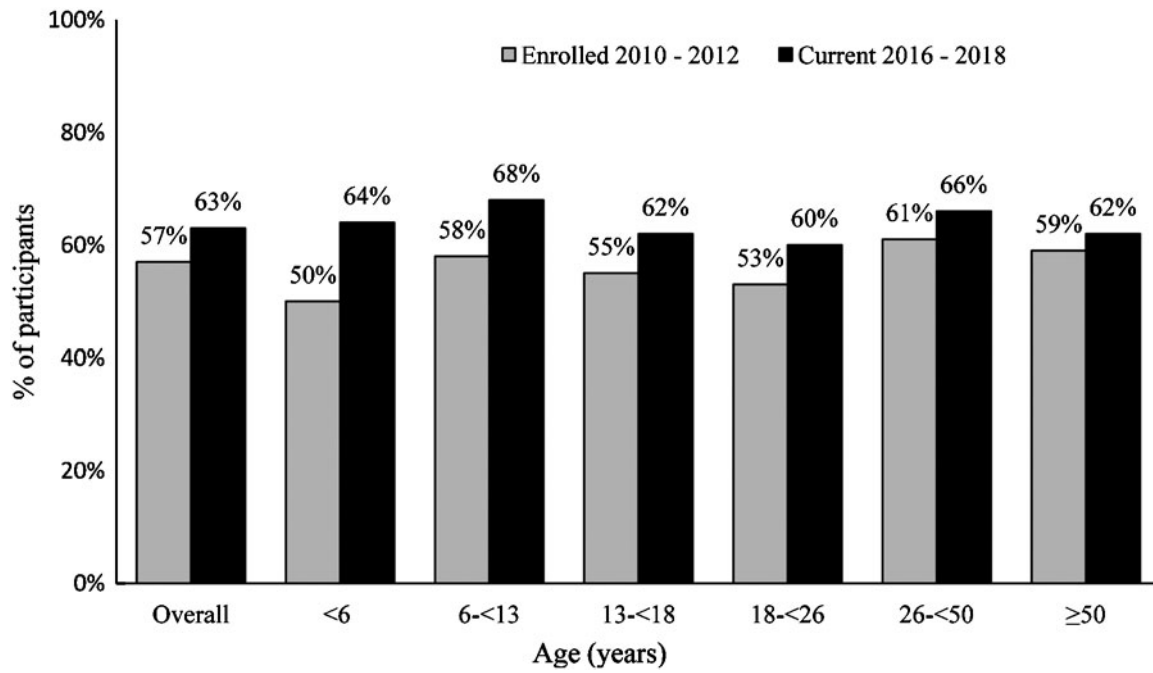

**SUPPLEMENTARY FIG. S1.** Pump use during 2010–2012 versus 2016–2018.

Supplement: Supp_Fig1.pdf [file Supp_Fig1.pdf]
